# Supplementary material
Source: publisher figshare collection journal article supplement (https://gsajournals.figshare.com/ndownloader/files/11562602)
Supplement: Supplementary file 1 [file 11562602]

## Sheet: Sheet1
Strain name		Sequence [5'–3']
chr7	5' sequence	AACATCAGTGGGGGACCTTTCTGTGGGGAGTTGGCATGTTCTTCCCGTCCATGCGTGGGTTTTCAGAGGGGACTCCGGCTTCCTCCCACTGTCCAAACAAGTGCTTCATAGGTTAATAGCTTACACGAAATTGTCCATAGGTCTGAATGTGAGTGTGCACTGGGGTGTGATTTGTGGCTTTGCGACAGACTATGGCGACCTATCCAGG
	3' sequence	TATCCAGGGTGTATTCTGCCTTTGCCCACATGTGGCCTGATTAGGCTCCGCCAGCGCCGGAGCCCCAAAAGGGATATTAACGGGTTTAGAAAATGAATAAATGAATATTTCATTTTGGTAGATGCACTTGACTGTCTTCATCTATTGAGGATGACTGTTGTTAAAGAGATGATGCAGCATGTTGAAAATGGAACAGCATCATCTGCTC
chr8	5' sequence	CTTCACACGGAGACGACCACCCCGACCCTTTTAGAAACGCAGCCGTGTGCGCACACACACACACACACACACACACGCAACCTTAGACACACATGCTTGCAAGCACAGATGGTCTCTTGGCAACAACTAGTGAACTAGATGGAACTGGTTCAGACTGAGTTACACAAGACTGCATCCAACAGCCAGGGAGGGGTGGGTGTGCTCCATG
	3' sequence	GCTCCATGAGGGGGGCCGAACGGATGGGAGCTGCAATTCAGAGATGAACGGGCCATTTTTCAGACAAACAAAGCCCCCCCTCAACTGAAAAGGGGAGGAGCTAAAGTAACCTCAATATCAGGGAGGCTGTAAACCGTTGACTGAACCCTAAAGGTAACGTCCTGACGTGCATCCATCTTTGATCTCTGGTGTTCTCCTCTGCCCCCTC
chr9	5' sequence	TCAGTAAAATCACAAATTGTGAGTTTTCCTCATATCGTGCAGCCCTAGTGTATGGTATATGGTTTTTTTTTCAAGTTGTTCTGCTTAAGACGAACGAACACATGCAGACAGAACTCTTTACAACCACCAGAGGGCGCTAAAACACCAGTAATACACCAGCTGAGCTGATGGTGATACATGTGAAGAAGGGAACATGGTGTCTTGTCTT
	3' sequence	CTTGTCTTACACCAAAACCCATTACAATCAGGAAAAGTAAAACTAAAACACACAGGTAAATTAAACACAAACACAGTTTTGTTTTCAATGCATGTCTGCATTTGATTGCATTAATAAGACCCTTTTGGGGAGGAAGTTCAGTGTGAAATAATAGGTACCCAGAAGCGTCTGATTCCCATCATCAAGCGTTCAGTTCAGCCTCTTCACC
chr10	5' sequence	TCTTTTGGAGATTGACACTTTGCAAAGCCACCTTTAACCTTCTACTCTGAATAGGTTCAGGGTCTGTCGTTTCTTCACTGTTTGTCTACACTCTGAATCATCTGTAGCTTCTTGGTCAACAAAAGATAATTGAAGCGTTGTTTACAGATCTAGTATTGATATTCAGTGAATCACTGGGGAAAGCAATAGAGAAAAATAAGGTCAGACT
	3' sequence	GTCAGACTAGCATGGACCTTTTGCCCCATTCCGTGTTTGCCCTATGTATGATTTATTAAGTTCAGTCTTTTATGTGAAGCGTGTGTGAAAAAGGATGAGAGTGCAAACGACACAGGACACATATTAGAAAGCAACAGCAGCACTCTTTCTCATTTATTCATTGTTTCAGCTTTCTTTCCCTATCTTTAGACCTTTCTTATTCATAGTC
chr11	5' sequence	TGACTGGTTCCAACTGAGAGAAATGAAGAGTTTTTAGTGACACTACAGGGGAAATGGGGCAAGTTGCTCAGCAGTTGCTGGGCAATTGAGATTGATTTATGGAGGAATGTGAAAATGAGAGAAAAACTGAAGAGATTAAGGATGTTGGACAAGTGGAACAAAGGTCAGAGGTGAAGATGACGAGTGGGGAGATTGTAGGAGGGCGGAG
	3' sequence	GGGCGGAGAATCTGCAGTGAGTTGAAAAAGATGAAGTGCTGGGATTTAATCACTGTTAGCGGGGGAGAAAGTGGAGACAGATGTGCGGGCCAAAGGCTGCGCAAAGAACCTCGCCTGAGCTGCGCTGTAGTGTCAGTCACAGAAAACCGGGATTACACAGACGAGTCAGGCAGGTCAGCAGATTTGGATGCAAAACCTTTGTTTCTTC
chr13	5' sequence	GGAGCTACGATAAGATGCAGGTAGGTATCATGTCCCAGGACACATCAGTTCCACTTGACTTGAACCATGAAGTTACAAAAAGTATGGATGGCTTCATTTCAGCAGCAGACTTACAGGGTAAACCTGAGGGGTGGCTTTTAGGTAGATTTCAGTGACACGGGGAAAATCTAACCCAGGGTGATAACTGTTCCACTGGGGGCCCAGCAGG
	3' sequence	CCAGCAGGGAGCCACAGATACTACAGCTGCAGCACCAAAGCGCGTAAAGCACGCGGCAGCACAACTTCCGGTTTAAAAGTTTACAAAAATAAAATTACTTTCTTAGGTGCCACACACTTTTTTTTTAAACTTTGACTCAAATAATAAGCTGAAATTTAAATCTGTTTTCGTTAAATACCGTTGACTGTTGCTCTTGCTCAGCTAAAAT
chr17	5' sequence	ACCCTGCGAATAGTGTCGCATATTTCAATTCGACTTTGCATTTCCAGAGGGGAGGGGAGATGACGTCAGTGCGATCTCCATGTGTCTGGCTGCTCAGTGACACATGCTAGGAGCAGTGCGGCCAGGCTTGTAGCCTTGAGTTAGCGGCAGAGAAGAGGGCTTTATGACAATTGTGCACTCCTGATGATTGTACACAGCTTCTCAGGAC
	3' sequence	CTCAGGACTATGTAGCAGCATTTTGTCGAAACCTTCTCTGGGTCTAGCTTTGTCTTCACACTGGGACCCACCTTCTGTCTCCCGCAGCTTCCCGCTGAGTGCATGTTGGTCCAACCAGCAAACTTTTTGCATGGCCAAATCTGCTGTAGCTGTTGATGGGGCTCCAGCTCTCAGCGAACAGCAAAATCAGCGGCAGGAGACTATCTTC
chr18	5' sequence	TAGCTGTCAGGAACTAAAATCTTTGGATAAATAACACTGGCCTGAATTTTTTTTTTTTTTTACTTTTTTTGCTTGTAGACCCATGACGCCTTTTTAAGTGAGTTAACAGGTTAGATGTGTTACTTGTGGCATACGCTTTGAACTGCACTGACATTTGACTGACCGTAGTTGAAAAAAACACAGACCGGGGAGATCCTCTCTCCGGGAC
	3' sequence	TCCGGGACCGAAGATCTTCCTTCGGGGGATTCACTTCCCCATTCGGACCCTCAGAGCCTCCAGAGCGGGTCAATAAAAGAACCAGTCTCTGTTCTTTTAGAGGAAACCTTTCTTTATTACTGTTCCGGTGAACTGCACAACACCCCCTCAATGTGCACTCACACACACACACTTGCACTGCGTCCTGCCGCGCTCTACCCCCCCCGTT
chr20	5' sequence	ATTTGCCACAAGAAACACAAAACAAATTAAAGACTTAAGAATAAAAATAAAAGCATTCGTAATAGTACAAAAATAATGACATAAAATTACCAAGTATCATAAACTAAAACTGTTGCCAACTAAATAGCTTAAAAGTAAAAAAAAAAAAAAAAACAGCGACCATACCAAAACCTCCAAATAGGAGACTGGTATCTGAAAGTGCTGTACG
	3' sequence	GCTGTACGTTACATTGGTGAAGGTTAATATGATTTTGTTAATTGAGGATTTAAACGATAAATAAAACCATAGATAAAACAAAGCTTGGAGAGTATTAACTCTTGCACCAACAAACAAACTGCTTGCACTGCACCACTGTGTCTGCTTTAATAAAATCTTCAAGGCATCATTATCAGCTACCTGCAGCCTCCTCATGCTGGATGTCCTG
chr22	5' sequence	AACAGGTTGCTCGGTACCTGATTCCTTTACGGTAAGTTCATCTCTAAGGCCCTAAAAGCACTAACTGAAGGCTGAAAAGACCAGATTTGTCATTTGAGGTCATCCACTTCTCCATACAATACTAACATGTGTTATTTCATTGCAGTGCACAAAGACCTATGTAGATGGTAAGTTTGCCAAATATCTTTCACTAAGAGAACATTAAACC
	3' sequence	ATTAAACCTACAGCTCAGTAGCTTGTTGAGCAGATAAATCTAATCCATTGAAATGCTCTTTTTACAGAGAACCTCATCTGTGCTGCAATCAACCAGTGGGTGGAATTCTATTTTACTACTATATAGAGATTGCATTGTCCCACAATTTTCTATTGTGGTGACAATGGCCATGCTTTTTGTTGCTCCTTTGTATAGGTCACGCCTTCAG
chr24	5' sequence	CACCCTCCAGTGCTGGTTGGTTTTTTGTTGTTGCTATGTTCAAGGGAGGACCGCTTCATGGCTGGAATGTCACACGGGGTTGCCACATCCATCCCTCCATCCATCCAACCATTCATCCATCCATCCATCTTCTTGATGGCTTTAATCCCTCTCAAGGTTGCAGGGTTGCTGGAGCCTATCCCAGCCACTGTTTGGACACACCCTGAAC
	3' sequence	CCCTGAACAAGTTTGGCAAAATGTCCAACGTTGTGTCCAAATTTCTTTACTGCTCACTACTTAGTGCACTAATTAGGGGTATCTGAATTGACAATTCCAAAATCCTGTGACCTGGAAATCTCCTAGAAGTCTCTGTAAAAAAACTTGTGTGCTCACTAGTTTGGCAAATATATTCAATTTCAAGTCAATTCATTCAATTCGAACCTCG
scf2752	5' sequence	GGTTTTGTCTCTCAGGTAGGATGAGAGCTGGAGAAGGATACATTTTGGAGAGAGATAGGTAGGAGATCTGTGGTGTCCCTGAGGGGAAAGTGGTCATTGGGGTCGACTTTAAAGTACATGTGGGTGAAGGAAAGAGAGGAAACAAGGGAGTGATAAAGAAATTTGGTGTTCTGGGAAGGAATGTGCAAGGACAGATGGTGGTAGGCAT
	3' sequence	GTAGGCATTGCCAAAAGCATAAAAAAGGCAGCGGTGAAGATTTTTTTTTTCTTCCAGAAAAGACATGACCATAGGGTGTCATAATAGTGGAGGGAAAAGGAGACAAGTAGATTGCATGCAGACTTTGTAACCTAAAATAAATCATTGACCAGAATTATTATGGCTACAGTAGTGCCAGATAGCATTCGATGGTGCTGTGAGGTTGACT
		*Red characters indicate duplicated 8bp at the integrated site
